# Supplementary material
Source: MDPI journal article supplement (https://www.mdpi.com/2076-3271/12/2/27)
Supplement: s1 [file s1]

# Emotion Processing in Peripheral Neuropathic Pain: An Observational Study

Gianluca Isoardo, Mauro Adenzato, Stefano Ciullo, Elena Fontana, Ilaria Stura, Giuseppe Migliaretti, Paolo Titolo, Enrico Matteoni, Andrea Calvo, Federica Laino, Francesca Palumbo and Rita B. Ardito

**Table S1.** Summary of motor and sensitive nerve conduction studies (NCS) results.

|                         | <u>MCV (m/s)</u>              |                               | <u>SCV (m/s)</u>              |                                | <u>CMAP amplitude (mV)</u> |                   | <u>SAP amplitude (mV)</u>        |                                  | <u>Latency (ms)</u>          |                              |
|-------------------------|-------------------------------|-------------------------------|-------------------------------|--------------------------------|----------------------------|-------------------|----------------------------------|----------------------------------|------------------------------|------------------------------|
|                         | <u>Right</u>                  | <u>Left</u>                   | <u>Right</u>                  | <u>Left</u>                    | <u>Right</u>               | <u>Left</u>       | <u>Right</u>                     | <u>Left</u>                      | <u>Right</u>                 | <u>Left</u>                  |
|                         | <u>Median</u>                 |                               |                               |                                |                            |                   |                                  |                                  |                              |                              |
| <u>All patients</u>     | <u>52.7 ± 4.7<sup>b</sup></u> | <u>52.9 ± 5.2<sup>b</sup></u> | <u>47.8 ± 8.8<sup>a</sup></u> | <u>47.8 ± 9.3<sup>a</sup></u>  | <u>9.2 ± 4.1</u>           | <u>8.8 ± 4.9</u>  | <u>24.7 ± 16.6<sup>a</sup></u>   | <u>28.6 ± 20.4<sup>a</sup></u>   | <u>4.2 ± 1.1<sup>a</sup></u> | <u>4 ± 1<sup>a</sup></u>     |
| <u>TAS-20 ≥ 52</u>      | <u>52.6 ± 4.6<sup>b</sup></u> | <u>51.2 ± 5.9<sup>b</sup></u> | <u>47.8 ± 9.5<sup>b</sup></u> | <u>47.3 ± 10.5<sup>a</sup></u> | <u>9.3 ± 4.4</u>           | <u>7.1 ± 5.1</u>  | <u>21.2 ± 14.2<sup>b</sup></u>   | <u>19.6 ± 15.4<sup>a</sup></u>   | <u>4.1 ± 1.1<sup>a</sup></u> | <u>4.2 ± 1.1<sup>a</sup></u> |
| <u>TAS-20 &lt; 52</u>   | <u>52.8 ± 4.9<sup>b</sup></u> | <u>54.1 ± 4.4<sup>b</sup></u> | <u>47.8 ± 8.5<sup>a</sup></u> | <u>48.3 ± 8.6<sup>a</sup></u>  | <u>9.0 ± 4.1</u>           | <u>10.2 ± 4.3</u> | <u>27.1 ± 17.8<sup>b</sup></u>   | <u>35.1 ± 22.9<sup>b</sup></u>   | <u>4.3 ± 1.1<sup>a</sup></u> | <u>3.9 ± 1.0<sup>a</sup></u> |
| <u>Healthy controls</u> | <u>57.9 ± 6.3</u>             | <u>59.6 ± 5</u>               | <u>59.7 ± 7.8</u>             | <u>62.2 ± 7.6</u>              | <u>9.6 ± 4</u>             | <u>10.4 ± 5.9</u> | <u>49.7 ± 21.2</u>               | <u>57.6 ± 21.9</u>               | <u>3.2 ± 0.3</u>             | <u>3.1 ± 0.4</u>             |
|                         | <u>Ulnar</u>                  |                               |                               |                                |                            |                   |                                  |                                  |                              |                              |
| <u>All patients</u>     | <u>58.6 ± 6.9</u>             | <u>59.2 ± 7</u>               | <u>56.7 ± 7.2</u>             | <u>56.9 ± 7.7</u>              | <u>8.1 ± 3.1</u>           | <u>7 ± 3.4</u>    | <u>28.9 ± 16.8<sup>a</sup></u>   | <u>32.1 ± 18.6<sup>b</sup></u>   | <u>2.6 ± 0.5</u>             | <u>2.7 ± 0.6</u>             |
| <u>TAS-20 ≥ 52</u>      | <u>58.4 ± 6.8</u>             | <u>60.0 ± 5.2</u>             | <u>56.5 ± 5.8</u>             | <u>54.9 ± 6.6</u>              | <u>8.3 ± 4.0</u>           | <u>6.4 ± 4.3</u>  | <u>22.8 ± 12.9<sup>b</sup></u>   | <u>23.2 ± 15.4<sup>b</sup></u>   | <u>2.8 ± 0.6</u>             | <u>2.7 ± 0.5</u>             |
| <u>TAS-20 &lt; 52</u>   | <u>58.8 ± 7.2</u>             | <u>58.8 ± 8.2</u>             | <u>56.8 ± 8.0</u>             | <u>58.4 ± 8.1</u>              | <u>7.8 ± 2.8</u>           | <u>7.5 ± 2.6</u>  | <u>32.8 ± 18.0<sup>b,d</sup></u> | <u>38.9 ± 18.2<sup>c,d</sup></u> | <u>2.5 ± 0.3</u>             | <u>2.7 ± 0.7</u>             |
| <u>Healthy controls</u> | <u>59 ± 6.5</u>               | <u>58 ± 6.2</u>               | <u>58.5 ± 6.8</u>             | <u>58.3 ± 6.8</u>              | <u>9.9 ± 4.1</u>           | <u>7.4 ± 3.8</u>  | <u>52.4 ± 22.3</u>               | <u>52 ± 22.8</u>                 | <u>2.7 ± 0.3</u>             | <u>3 ± 0.5</u>               |

CMAP = Compound Muscle Action Potential; m = meters; MCV = Motor Conduction Velocity; ms = milliseconds; mV = millivolts; s = seconds; SAP = Sensor Action Potential; SCV = Sensor Conduction Velocity. <sup>a</sup> p < 0.0001 versus healthy controls; <sup>b</sup> p < 0.01 versus healthy controls; <sup>c</sup> p < 0.05 versus healthy controls; <sup>d</sup> p < 0.05 versus non-alexithymic patients.

**Table S2.** Summary of CDT, HPT and VDT (log and ln transformed data) at different sites in moderate-high and non-alexithymic patients.

|                      |          | <u>All patients</u>              | <u>Moderate-High Alexithymia</u>   | <u>No-alexithymia</u>            | <u>Healthy controls</u> |
|----------------------|----------|----------------------------------|------------------------------------|----------------------------------|-------------------------|
| <u>CDT</u>           |          |                                  |                                    |                                  |                         |
| <u>Dorsum</u>        | <u>R</u> | <u>1.482 ± 0.056</u>             | <u>1.488 ± 0.024</u>               | <u>1.478 ± 0.070</u>             | <u>1.500 ± 0.003</u>    |
|                      | <u>L</u> | <u>1.303 ± 0.633<sup>a</sup></u> | <u>1.232 ± 0.765<sup>a</sup></u>   | <u>1.363 ± 0.52<sup>a</sup></u>  | <u>1.500 ± 0.002</u>    |
| <u>Index</u>         | <u>R</u> | <u>1.470 ± 0.051<sup>a</sup></u> | <u>1.459 ± 0.054<sup>a</sup></u>   | <u>1.477 ± 0.049</u>             | <u>1.493 ± 0.013</u>    |
|                      | <u>L</u> | <u>1.297 ± 0.656<sup>a</sup></u> | <u>1.244 ± 0.727<sup>a,c</sup></u> | <u>1.334 ± 0.612</u>             | <u>1.496 ± 0.003</u>    |
| <u>Little finger</u> | <u>R</u> | <u>1.467 ± 0.051</u>             | <u>1.473 ± 0.026</u>               | <u>1.464 ± 0.061</u>             | <u>1.483 ± 0.020</u>    |
|                      | <u>L</u> | <u>1.196 ± 0.768<sup>a</sup></u> | <u>1.076 ± 0.924<sup>a</sup></u>   | <u>1.277 ± 0.646<sup>a</sup></u> | <u>1.487 ± 0.018</u>    |
| <u>HPT</u>           |          |                                  |                                    |                                  |                         |
| <u>Dorsum</u>        | <u>R</u> | <u>1.634 ± 0.041</u>             | <u>1.640 ± 0.037</u>               | <u>1.630 ± 0.044</u>             | <u>1.639 ± 0.040</u>    |
|                      | <u>L</u> | <u>1.632 ± 0.042</u>             | <u>1.646 ± 0.040</u>               | <u>1.621 ± 0.041</u>             | <u>1.640 ± 0.637</u>    |
| <u>Index</u>         | <u>R</u> | <u>1.660 ± 0.034</u>             | <u>1.608 ± 0.028</u>               | <u>1.652 ± 0.036</u>             | <u>1.652 ± 0.032</u>    |
|                      | <u>L</u> | <u>1.635 ± 0.128</u>             | <u>1.652 ± 0.029</u>               | <u>1.617 ± 0.162</u>             | <u>1.649 ± 0.034</u>    |
| <u>Little finger</u> | <u>R</u> | <u>1.653 ± 0.034</u>             | <u>1.657 ± 0.033</u>               | <u>1.650 ± 0.034</u>             | <u>1.658 ± 0.035</u>    |
|                      | <u>L</u> | <u>1.654 ± 0.037</u>             | <u>1.668 ± 0.023</u>               | <u>1.649 ± 0.036</u>             | <u>1.661 ± 0.034</u>    |
| <u>VDT</u>           |          |                                  |                                    |                                  |                         |

|                      |          |                                   |                                     |                                   |                       |
|----------------------|----------|-----------------------------------|-------------------------------------|-----------------------------------|-----------------------|
| <u>Index</u>         | <u>R</u> | <u>-0.241 ± 0.942<sup>a</sup></u> | <u>-0.087 ± 0.950<sup>a</sup></u>   | <u>-0.348 ± 0.934<sup>b</sup></u> | <u>-0.848 ± 0.805</u> |
|                      | <u>L</u> | <u>-0.109 ± 1.665<sup>a</sup></u> | <u>0.808 ± 1.887<sup>a, c</sup></u> | <u>-0.761 ± 0.94<sup>a</sup></u>  | <u>-1.003 ± 0.773</u> |
| <u>Little finger</u> | <u>R</u> | <u>-0.194 ± 0.918<sup>a</sup></u> | <u>-0.153 ± 0.990<sup>a</sup></u>   | <u>-0.319 ± 0.864</u>             | <u>-0.876 ± 0.824</u> |
|                      | <u>L</u> | <u>-0.040 ± 1.481<sup>a</sup></u> | <u>0.406 ± 1.965<sup>a</sup></u>    | <u>-0.357 ± 0.918<sup>a</sup></u> | <u>-0.953 ± 0.859</u> |

CDT = Cold Pain Threshold; HPT = Heat Pain Threshold; L = Left; R = Right; VDT = Vibration Detection Threshold.<sup>a</sup> p < 0.01 vs healthy controls; <sup>b</sup> p < 0.05 vs healthy controls; <sup>c</sup> p < 0.01 vs non-alexithymic patients.
